# Supplementary material
Source: Springer Nature journal article supplement (https://www.springermedizin.de/resource/supplementary/12889_2011_3840_MOESM5_ESM.pdf/9492268)

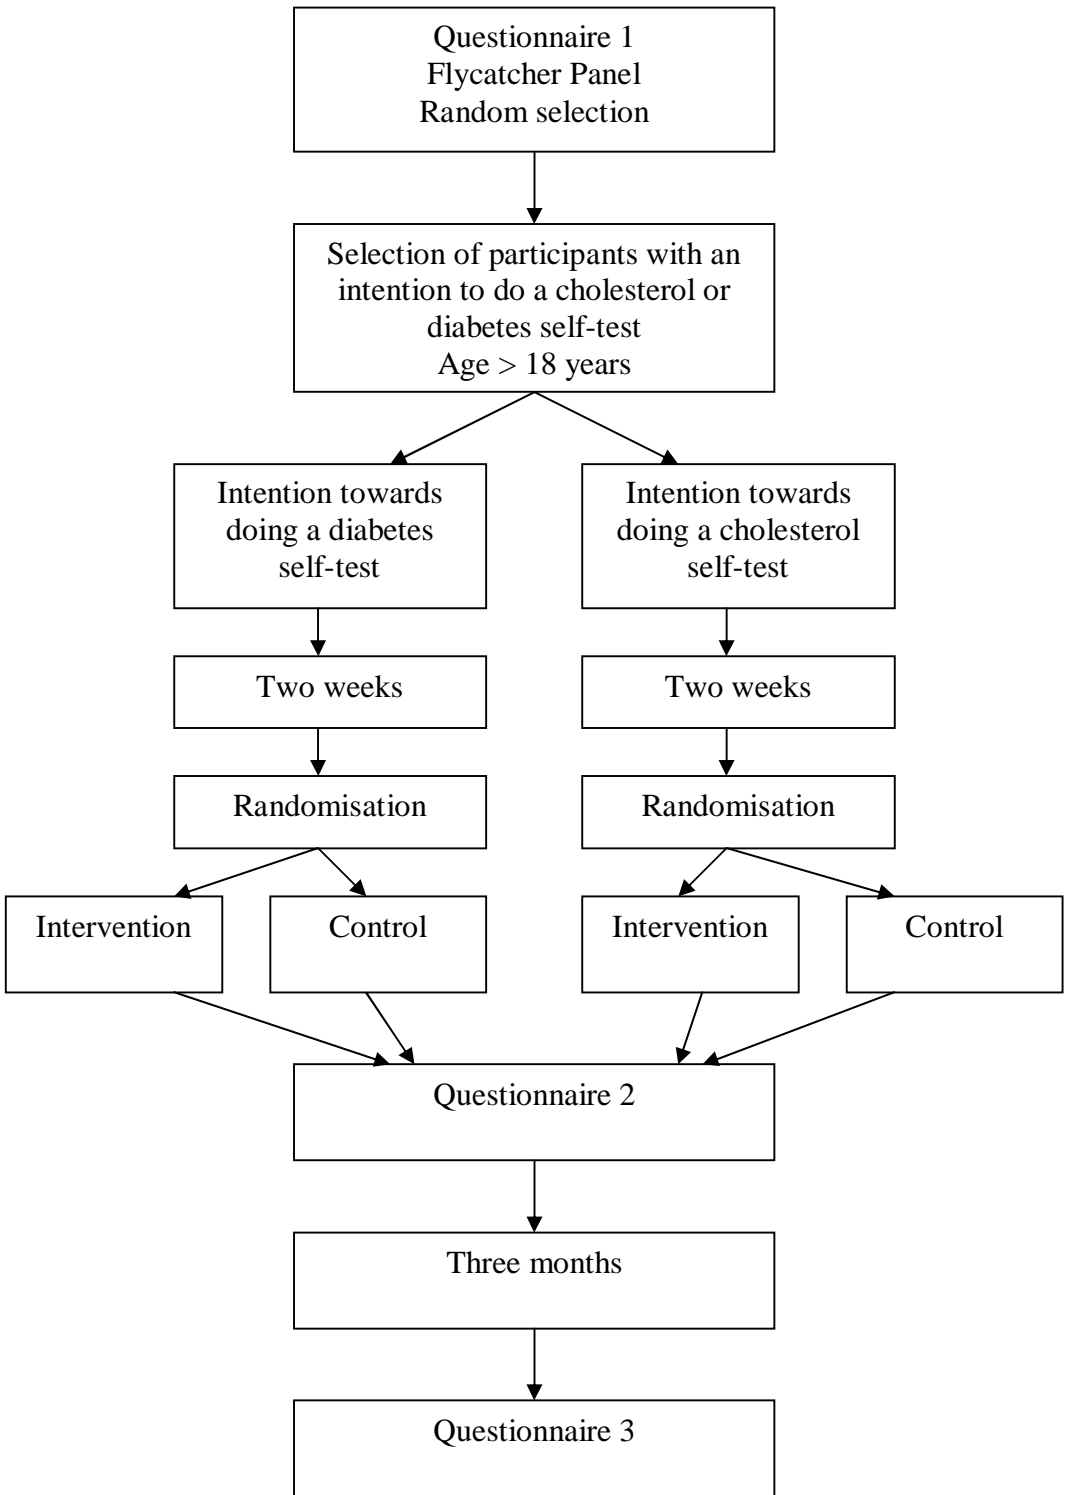

Supplement: MOESM5 [file 9492268]
